# Supplementary material for: Cancer Survivorship in the Age of YouTube and Social Media: A Narrative Analysis
Source: PubMed Central journal article supplement (PMC3221357; doi:10.2196/jmir.1569), 2011-01-17
Supplement: jmir_v13i1e7_app1.pdf [file jmir_v13i1e7_app1.pdf]

| Link                                                                                                                                        | Title                                                                                                    | Length (minutes) | Date Posted | Notes           |
|---------------------------------------------------------------------------------------------------------------------------------------------|----------------------------------------------------------------------------------------------------------|------------------|-------------|-----------------|
| <a href="http://www.youtube.com/watch?v=xI16WQwwsE8">http://www.youtube.com/watch?v=xI16WQwwsE8</a>                                         | Thyroid Cancer Story                                                                                     | 4:08             | 24/11/2008  |                 |
| <a href="http://www.youtube.com/watch?v=nyZPIRHwf4k">http://www.youtube.com/watch?v=nyZPIRHwf4k</a>                                         | Cancer Story                                                                                             | 6:37             | 22/10/2008  |                 |
| <a href="http://www.youtube.com/watch?v=HvuURupZoMw">http://www.youtube.com/watch?v=HvuURupZoMw</a>                                         | Hodgkins Lymphoma Cancer Entry One - finding peace - My Story                                            | 7:33             | 21/02/2009  |                 |
| <a href="http://www.youtube.com/watch?v=MXh5GfaCATs">http://www.youtube.com/watch?v=MXh5GfaCATs</a>                                         | Hodgkins Lymphoma Cancer Entry Two - treatment begins - My Story                                         | 8:57             | 28/02/2009  |                 |
| <a href="http://www.youtube.com/watch?v=zzXvsO9fyWk">http://www.youtube.com/watch?v=zzXvsO9fyWk</a>                                         | Hodgkins Lymphoma Cancer Entry Three - the routine - My Story                                            | 5:26             | 12/03/2009  |                 |
| <a href="http://www.youtube.com/watch?v=DuiG-OQVnJs">http://www.youtube.com/watch?v=DuiG-OQVnJs</a>                                         | Hodgkins Lymphoma Cancer Entry Four - my trust - My Story                                                | 6:08             | 16/03/2009  |                 |
| <a href="http://www.youtube.com/watch?v=pwvF_Y_9iX8&amp;feature=related">http://www.youtube.com/watch?v=pwvF_Y_9iX8&amp;feature=related</a> | Breast Cancer Survivor: Rose Gerber                                                                      | 6:29             | 15/10/2007  |                 |
| <a href="http://www.youtube.com/watch?v=xijpVbAyHHE">http://www.youtube.com/watch?v=xijpVbAyHHE</a>                                         | My Cancer survival story                                                                                 |                  |             | Removed by user |
| <a href="http://www.youtube.com/watch?v=TRINsh7zJnY">http://www.youtube.com/watch?v=TRINsh7zJnY</a>                                         | Diagnosed With Cancer While Pregnant                                                                     | 5:56             | 23/05/2008  |                 |
| <a href="http://www.youtube.com/watch?v=rBPPmUdEdZg">http://www.youtube.com/watch?v=rBPPmUdEdZg</a>                                         | Brenda Ladun Story                                                                                       | 5:01             | 26/01/2008  |                 |
| <a href="http://www.youtube.com/watch?v=9LclPbmUT_g">http://www.youtube.com/watch?v=9LclPbmUT_g</a>                                         | Rebekah Gibbs on cancer                                                                                  | 5:24             | 17/04/2008  |                 |
| <a href="http://www.youtube.com/watch?v=8l8zDj89RfY">http://www.youtube.com/watch?v=8l8zDj89RfY</a>                                         | Team Medicine Stories - Bill and Prostate Cancer                                                         | 3:03             | 23/03/2009  |                 |
| <a href="http://www.youtube.com/watch?v=yodfW8PJJKc">http://www.youtube.com/watch?v=yodfW8PJJKc</a>                                         | You Can Thrive! Breast Cancer Survivor Stories                                                           | 5:33             | 30/09/2008  |                 |
| <a href="http://www.youtube.com/watch?v=-ynrcwNd0BA">http://www.youtube.com/watch?v=-ynrcwNd0BA</a>                                         | Augusta Williams' Story of Breast Cancer Survival                                                        | 8:50             | 07/11/2008  |                 |
| <a href="http://www.youtube.com/watch?v=r1Wnjla8toM">http://www.youtube.com/watch?v=r1Wnjla8toM</a>                                         | Broken Hope - A Young Adult Breast Cancer Story                                                          | 2:43             | 21/04/2009  |                 |
| <a href="http://www.youtube.com/watch?v=j9Pe7W-yO2g">http://www.youtube.com/watch?v=j9Pe7W-yO2g</a>                                         | My Cancer and Chemotherapy Story                                                                         | 8:24             | 08/08/2007  |                 |
| <a href="http://www.youtube.com/watch?v=8YLbjZIdmwM">http://www.youtube.com/watch?v=8YLbjZIdmwM</a>                                         | My cancer story                                                                                          | 3:51             | 11/09/2008  |                 |
| <a href="http://www.youtube.com/watch?v=3W9F4ftqZe0">http://www.youtube.com/watch?v=3W9F4ftqZe0</a>                                         | Jessica's Story                                                                                          | 3:54             | 21/04/2009  |                 |
| <a href="http://www.youtube.com/watch?v=j28PPEt8KG8">http://www.youtube.com/watch?v=j28PPEt8KG8</a>                                         | Amazing Story                                                                                            | 1:00             | 01/06/2007  |                 |
| <a href="http://www.youtube.com/watch?v=R6sNbgMmUS0">http://www.youtube.com/watch?v=R6sNbgMmUS0</a>                                         | Charron Walker, Breast Cancer Survivor & Founder of the Young Survivors' Network on Cancer Survivor Book | 9:48             | 25/02/2009  | Removed by user |
| <a href="http://www.youtube.com/watch?v=8DkaLrVnLHI">http://www.youtube.com/watch?v=8DkaLrVnLHI</a>                                         | Lisa, breast cancer survivor, helps others with cancer                                                   |                  |             | Removed by user |
| <a href="http://www.youtube.com/watch?v=HkhHYZ0b94U">http://www.youtube.com/watch?v=HkhHYZ0b94U</a>                                         | You Don't Have To Die When Your Doctor says                                                              | 7:57             | 13/05/2009  |                 |
| <a href="http://www.youtube.com/watch?v=OFjS2mAcOoI&amp;feature=related">http://www.youtube.com/watch?v=OFjS2mAcOoI&amp;feature=related</a> | My testicular Cancer Story                                                                               | 1:40             | 30/01/2008  |                 |
| <a href="http://www.youtube.com/watch?v=P3fXU_9gTjg">http://www.youtube.com/watch?v=P3fXU_9gTjg</a>                                         | My cancer story by Eric Larson                                                                           | 9:44             | 14/03/2007  |                 |
| <a href="http://www.youtube.com/watch?v=SdJoke3x_zU">http://www.youtube.com/watch?v=SdJoke3x_zU</a>                                         | My cancer story                                                                                          | 4:46             | 14/04/2007  |                 |
| <a href="http://www.youtube.com/watch?v=3t9p-vuTG80">http://www.youtube.com/watch?v=3t9p-vuTG80</a>                                         | Coralee's Breast cancer story                                                                            | 6:45             | 18/02/2007  |                 |
| <a href="http://www.youtube.com/watch?v=-29tzyFACQg">http://www.youtube.com/watch?v=-29tzyFACQg</a>                                         | My cancer story                                                                                          | 2:56             | 08/02/2007  |                 |
| <a href="http://www.youtube.com/watch?v=kWwqEsw7caU">http://www.youtube.com/watch?v=kWwqEsw7caU</a>                                         | Cancer survivor's miraculous story Part 1                                                                | 10:43            | 08/07/2007  |                 |
| <a href="http://www.youtube.com/watch?v=RabWbJRaxes">http://www.youtube.com/watch?v=RabWbJRaxes</a>                                         | Cancer Survivor's Miraculous Story Par 2                                                                 | 3:18             | 08/07/2007  |                 |
| Part 2: <a href="http://www.youtube.com/watch?v=VKw_6bViV3U">http://www.youtube.com/watch?v=VKw_6bViV3U</a>                                 | Cancer survivor                                                                                          | 7:33             | 07/09/2008  |                 |
| <a href="http://www.youtube.com/watch?v=SbPPS5cXK1c">http://www.youtube.com/watch?v=SbPPS5cXK1c</a>                                         | Breast Cancer Survivor Story: In Her Own Words                                                           | 4:03             | 04/09/2007  |                 |
| <a href="http://www.youtube.com/watch?v=qiJLmgIw6Pc">http://www.youtube.com/watch?v=qiJLmgIw6Pc</a>                                         | Rosemary's Cancer Survival Story                                                                         | 8:43             | 05/08/2008  |                 |
| <a href="http://www.youtube.com/watch?v=I4ZqhTopO4g">http://www.youtube.com/watch?v=I4ZqhTopO4g</a>                                         | Beating breast cancer during business school: Katie's Story                                              | 2:22             | 01/05/2008  |                 |
